# Supplementary material
Source: PubMed Central journal article supplement (PMC6135710)
Supplement: NIHMS933733-supplement-Supplemental_Data_File___doc___tif__pdf__etc___2.pdf [file NIHMS933733-supplement-Supplemental_Data_File___doc___tif__pdf__etc___2.pdf]

## Supplemental Digital Content 2

### Free-Text Survey Results

| : 1                                                          | Frequency | Percent | Cumulative Frequency | Cumulative Percent |
|--------------------------------------------------------------|-----------|---------|----------------------|--------------------|
| Access to follow up appts                                    | 1         | 0.49    | 1                    | 0.49               |
| Acuity of Medical Condition                                  | 1         | 0.49    | 2                    | 0.98               |
| Acuity of clientele                                          | 1         | 0.49    | 3                    | 1.46               |
| Age                                                          | 1         | 0.49    | 4                    | 1.95               |
| Alcoholism                                                   | 2         | 0.98    | 6                    | 2.93               |
| Chronic diagnosis, such as heart failure                     | 1         | 0.49    | 7                    | 3.41               |
| Chronic illness                                              | 1         | 0.49    | 8                    | 3.90               |
| Co morbidities unrelated to illness                          | 1         | 0.49    | 9                    | 4.39               |
| Cognitive status of patient or primary caregiver             | 1         | 0.49    | 10                   | 4.88               |
| Communication defocits                                       | 1         | 0.49    | 11                   | 5.37               |
| Compliance of the patient                                    | 2         | 0.98    | 13                   | 6.34               |
| Cultural opposition to institutionalizing family members, e  | 1         | 0.49    | 14                   | 6.83               |
| D/c destination does not match with PT's recommended option  | 1         | 0.49    | 15                   | 7.32               |
| DC'd too early from acute care hospital                      | 1         | 0.49    | 16                   | 7.80               |
| Dc before medically stable due to pressure from insurance co | 1         | 0.49    | 17                   | 8.29               |
| Decreased ability to comply with medical discharge instructi | 1         | 0.49    | 18                   | 8.78               |
| Decreasing Length of stay without looking at continuum       | 1         | 0.49    | 19                   | 9.27               |
| Did not transition to the first best care setting            | 1         | 0.49    | 20                   | 9.76               |
| Discharge to soon                                            | 1         | 0.49    | 21                   | 10.24              |
| Discharge to the wrong location                              | 1         | 0.49    | 22                   | 10.73              |
| Discharge too early/fast                                     | 1         | 0.49    | 23                   | 11.22              |
| Discharged too soon due to trying to decrease length of stay | 1         | 0.49    | 24                   | 11.71              |
| Disposition home when post-acute Rehab was recommended       | 1         | 0.49    | 25                   | 12.20              |
| Early discharge from hospital on initial admit               | 1         | 0.49    | 26                   | 12.68              |
| Economic status                                              | 1         | 0.49    | 27                   | 13.17              |
| Elderly                                                      | 1         | 0.49    | 28                   | 13.66              |
| Emphasis to reduce LOS                                       | 1         | 0.49    | 29                   | 14.15              |
| Facilities dcd to don't/can't enforce restrictions(fluid, di | 1         | 0.49    | 30                   | 14.63              |
| Falls                                                        | 2         | 0.98    | 32                   | 15.61              |
| Falls at home                                                | 1         | 0.49    | 33                   | 16.10              |
| Follow up with primary care physician                        | 1         | 0.49    | 34                   | 16.59              |
| Gait ability                                                 | 1         | 0.49    | 35                   | 17.07              |
| Gap in service between hospital D/C and HHC services         | 1         | 0.49    | 36                   | 17.56              |
| High level of patient acuity                                 | 1         | 0.49    | 37                   | 18.05              |
| Impaired functional mobility                                 | 1         | 0.49    | 38                   | 18.54              |

| : 1                                                          | Frequency | Percent | Cumulative Frequency | Cumulative Percent |
|--------------------------------------------------------------|-----------|---------|----------------------|--------------------|
| Inadequate follow up                                         | 1         | 0.49    | 39                   | 19.02              |
| Inadequate handoffs                                          | 1         | 0.49    | 40                   | 19.51              |
| Inadequate post-acute care                                   | 1         | 0.49    | 41                   | 20.00              |
| Inappropriate (inadequate) discharge plan                    | 1         | 0.49    | 42                   | 20.49              |
| Inappropriate D/C disposition - pt refuses recommended D/C   | 1         | 0.49    | 43                   | 20.98              |
| Inappropriate d/c location                                   | 1         | 0.49    | 44                   | 21.46              |
| Inappropriate discharge destination                          | 1         | 0.49    | 45                   | 21.95              |
| Inappropriate discharge locations                            | 1         | 0.49    | 46                   | 22.44              |
| Inappropriate discharge setting                              | 1         | 0.49    | 47                   | 22.93              |
| Incorrect discharge location                                 | 1         | 0.49    | 48                   | 23.41              |
| Lack of access to resources                                  | 1         | 0.49    | 49                   | 23.90              |
| Lack of adequate medical f/u                                 | 1         | 0.49    | 50                   | 24.39              |
| Lack of assurance that PT has received HHPT.                 | 1         | 0.49    | 51                   | 24.88              |
| Lack of care planning                                        | 1         | 0.49    | 52                   | 25.37              |
| Lack of communication to sub acute settings                  | 1         | 0.49    | 53                   | 25.85              |
| Lack of competent social support                             | 1         | 0.49    | 54                   | 26.34              |
| Lack of discharge information re: mobility                   | 1         | 0.49    | 55                   | 26.83              |
| Lack of family support                                       | 1         | 0.49    | 56                   | 27.32              |
| Lack of patient and caregiver education                      | 1         | 0.49    | 57                   | 27.80              |
| Lack of prescribed meds at home                              | 1         | 0.49    | 58                   | 28.29              |
| Lack of resources in community                               | 1         | 0.49    | 59                   | 28.78              |
| Limited caregiver assistance in homes                        | 1         | 0.49    | 60                   | 29.27              |
| Medical acuity                                               | 1         | 0.49    | 61                   | 29.76              |
| Medically indigent population                                | 1         | 0.49    | 62                   | 30.24              |
| Medication management                                        | 1         | 0.49    | 63                   | 30.73              |
| Medication non-compliance                                    | 1         | 0.49    | 64                   | 31.22              |
| Medication noncompliance                                     | 1         | 0.49    | 65                   | 31.71              |
| Medication reconciliation concerns                           | 1         | 0.49    | 66                   | 32.20              |
| Meds                                                         | 1         | 0.49    | 67                   | 32.68              |
| Multiple comorbidities                                       | 1         | 0.49    | 68                   | 33.17              |
| No follow up after discharge                                 | 1         | 0.49    | 69                   | 33.66              |
| Non-compliance                                               | 1         | 0.49    | 70                   | 34.15              |
| Non-compliance with prescribed medications                   | 1         | 0.49    | 71                   | 34.63              |
| Not accessing services (medical f/u, pharm, edu, DME, rehab, | 1         | 0.49    | 72                   | 35.12              |
| Not following therapists discharge recommendations           | 1         | 0.49    | 73                   | 35.61              |
|                                                              |           |         |                      |                    |

## The FREQ Procedure

| : 1                                                           | Frequency | Percent | Cumulative Frequency | Cumulative Percent |
|---------------------------------------------------------------|-----------|---------|----------------------|--------------------|
| Observation Status limiting patients from d/c'ing to SNF (esp | 1         | 0.49    | 74                   | 36.10              |
| PCP follow up                                                 | 1         | 0.49    | 75                   | 36.59              |
| PT discharge recommendations not followed                     | 1         | 0.49    | 76                   | 37.07              |
| Patient Education (lack of)                                   | 1         | 0.49    | 77                   | 37.56              |
| Patient Non-compliance                                        | 1         | 0.49    | 78                   | 38.05              |
| Patient Noncompliance                                         | 1         | 0.49    | 79                   | 38.54              |
| Patient compliance                                            | 1         | 0.49    | 80                   | 39.02              |
| Patient compliance to recommendations and directions          | 1         | 0.49    | 81                   | 39.51              |
| Patient compliance with medical team recommendations          | 1         | 0.49    | 82                   | 40.00              |
| Patient discharged before being medically optimized           | 1         | 0.49    | 83                   | 40.49              |
| Patient discharged to location other than recommended by PT   | 1         | 0.49    | 84                   | 40.98              |
| Patient does not go to appointments                           | 1         | 0.49    | 85                   | 41.46              |
| Patient non compliance medications or regimen                 | 1         | 0.49    | 86                   | 41.95              |
| Patient noncompliance                                         | 3         | 1.46    | 89                   | 43.41              |
| Patient noncompliance with instructions                       | 1         | 0.49    | 90                   | 43.90              |
| Patient noncompliance with meds                               | 1         | 0.49    | 91                   | 44.39              |
| Patient refusal to go to recommended level of care            | 1         | 0.49    | 92                   | 44.88              |
| Patient was not medically ready                               | 1         | 0.49    | 93                   | 45.37              |
| Patient's "non-acceptance" of PTs recs                        | 1         | 0.49    | 94                   | 45.85              |
| Patient's cognition                                           | 1         | 0.49    | 95                   | 46.34              |
| Patient/family non-compliance with DC instructions            | 1         | 0.49    | 96                   | 46.83              |
| Patients being discharged too early against PT recommendatio  | 1         | 0.49    | 97                   | 47.32              |
| Patients disagree with DC recommendation                      | 1         | 0.49    | 98                   | 47.80              |
| Patients getting discharged too soon - cost saving technique  | 1         | 0.49    | 99                   | 48.29              |
| Patients noncompliance with recommendations                   | 1         | 0.49    | 100                  | 48.78              |
| Patients not following medical advice                         | 1         | 0.49    | 101                  | 49.27              |
| Patients not regularly mobilized by nursing staff during adm  | 1         | 0.49    | 102                  | 49.76              |
| Patients refusing PT recommendations for SNF or cont care     | 1         | 0.49    | 103                  | 50.24              |
| Patients with complex, chronic needs need more follow up      | 1         | 0.49    | 104                  | 50.73              |
| Polypharmacy                                                  | 1         | 0.49    | 105                  | 51.22              |
| Poor communcation post discharge with the patient             | 1         | 0.49    | 106                  | 51.71              |
| Poor communication                                            | 1         | 0.49    | 107                  | 52.20              |
| Poor follow up after discharge                                | 1         | 0.49    | 108                  | 52.68              |
| Poor follow up with PT after DC                               | 1         | 0.49    | 109                  | 53.17              |
| Poor medical followup after discharge (e.g. medication compl  | 1         | 0.49    | 110                  | 53.66              |

| : 1                                                          | Frequency | Percent | Cumulative Frequency | Cumulative Percent |
|--------------------------------------------------------------|-----------|---------|----------------------|--------------------|
| Poor patient adherence to plan                               | 1         | 0.49    | 111                  | 54.15              |
| Poor patient and caregiver education                         | 1         | 0.49    | 112                  | 54.63              |
| Poor patient compliance with discharge instructions          | 1         | 0.49    | 113                  | 55.12              |
| Poor patient followup                                        | 1         | 0.49    | 114                  | 55.61              |
| Poor relationship with pcip                                  | 1         | 0.49    | 115                  | 56.10              |
| Poor support systems for meals, meds, CPAP, diabetes care, e | 1         | 0.49    | 116                  | 56.59              |
| Premature discharge                                          | 1         | 0.49    | 117                  | 57.07              |
| Progression of disease process                               | 1         | 0.49    | 118                  | 57.56              |
| Pt being easily DC from hospital                             | 1         | 0.49    | 119                  | 58.05              |
| Pt funding status does not allow for appropriate discharge l | 1         | 0.49    | 120                  | 58.54              |
| Pt non-compliance                                            | 2         | 0.98    | 122                  | 59.51              |
| Recommended services not received                            | 1         | 0.49    | 123                  | 60.00              |
| Rush to get patients discharged                              | 1         | 0.49    | 124                  | 60.49              |
| Short initial LOS                                            | 1         | 0.49    | 125                  | 60.98              |
| Socioeconomic factors                                        | 1         | 0.49    | 126                  | 61.46              |
| Socioeconomic status of our population (i.e. can't afford pr | 1         | 0.49    | 127                  | 61.95              |
| Surgical Site infection                                      | 1         | 0.49    | 128                  | 62.44              |
| Un or underinsured with lack of access to medication         | 1         | 0.49    | 129                  | 62.93              |
| Unfunded patients, those who use the ED as their primary car | 1         | 0.49    | 130                  | 63.41              |
| age                                                          | 1         | 0.49    | 131                  | 63.90              |
| appropriate discharge location                               | 1         | 0.49    | 132                  | 64.39              |
| chronic disease management                                   | 1         | 0.49    | 133                  | 64.88              |
| chronic dx exacerbations                                     | 1         | 0.49    | 134                  | 65.37              |
| chronic illness not managed well at home                     | 1         | 0.49    | 135                  | 65.85              |
| co-morbidities                                               | 1         | 0.49    | 136                  | 66.34              |
| complex medical problems and lack of follow-up with medicati | 1         | 0.49    | 137                  | 66.83              |
| discharge destination fails to continue progress/education   | 1         | 0.49    | 138                  | 67.32              |
| discharge home (family/pt insistance) rather than SNF if rec | 1         | 0.49    | 139                  | 67.80              |
| discharge prior to meeting independent and/or safe mobility  | 1         | 0.49    | 140                  | 68.29              |
| discontinuity in communication among providers               | 1         | 0.49    | 141                  | 68.78              |
| early discharge                                              | 1         | 0.49    | 142                  | 69.27              |
| education for safety at home                                 | 1         | 0.49    | 143                  | 69.76              |
| failure of patients to have access to programs to assist the | 1         | 0.49    | 144                  | 70.24              |
| falls                                                        | 1         | 0.49    | 145                  | 70.73              |
| general mobility throughout the day before/after therapy int | 1         | 0.49    | 146                  | 71.22              |
|                                                              |           |         |                      |                    |

| : 1                                                          | Frequency | Percent | Cumulative Frequency | Cumulative Percent |
|--------------------------------------------------------------|-----------|---------|----------------------|--------------------|
| immobility                                                   | 1         | 0.49    | 147                  | 71.71              |
| inadequate resources for patients at discharge for f/u care  | 1         | 0.49    | 148                  | 72.20              |
| inadequate support at home                                   | 1         | 0.49    | 149                  | 72.68              |
| incorrect discharge plan                                     | 1         | 0.49    | 150                  | 73.17              |
| insufficient resources in community health outside the hospi | 1         | 0.49    | 151                  | 73.66              |
| lack of adequate mobility                                    | 1         | 0.49    | 152                  | 74.15              |
| lack of communication between acute and post acute settings  | 1         | 0.49    | 153                  | 74.63              |
| lack of communication by health providers from acute care to | 1         | 0.49    | 154                  | 75.12              |
| lack of continuity of care within hospitalization, especiall | 1         | 0.49    | 155                  | 75.61              |
| lack of coordination with post acute provider                | 1         | 0.49    | 156                  | 76.10              |
| lack of follow up with primary care physicians               | 1         | 0.49    | 157                  | 76.59              |
| lack of mobility as an inpatient                             | 1         | 0.49    | 158                  | 77.07              |
| lack of mobility in the hospital                             | 1         | 0.49    | 159                  | 77.56              |
| lack of patient follow up of recommendations                 | 1         | 0.49    | 160                  | 78.05              |
| lack of payor source and social support                      | 1         | 0.49    | 161                  | 78.54              |
| lack of pt resources to follow up-meds, specialists, appts.. | 1         | 0.49    | 162                  | 79.02              |
| lack of social support                                       | 1         | 0.49    | 163                  | 79.51              |
| lack of support in home                                      | 1         | 0.49    | 164                  | 80.00              |
| limited availability to timely follow up appointments        | 1         | 0.49    | 165                  | 80.49              |
| med management                                               | 1         | 0.49    | 166                  | 80.98              |
| medical complications, including DVTs/PEs, PNA, transplant r | 1         | 0.49    | 167                  | 81.46              |
| medical decline after discharge                              | 1         | 0.49    | 168                  | 81.95              |
| medical diagnoses                                            | 1         | 0.49    | 169                  | 82.44              |
| medical issues not completely resolved                       | 1         | 0.49    | 170                  | 82.93              |
| medication access                                            | 1         | 0.49    | 171                  | 83.41              |
| medication management                                        | 1         | 0.49    | 172                  | 83.90              |
| non compliance                                               | 2         | 0.98    | 174                  | 84.88              |
| non compliance with medication due to cost                   | 1         | 0.49    | 175                  | 85.37              |
| non-compliance                                               | 2         | 0.98    | 177                  | 86.34              |
| non-compliance w/meds and/or follow-up                       | 1         | 0.49    | 178                  | 86.83              |
| non-compliance with discharge recommendations                | 1         | 0.49    | 179                  | 87.32              |
| non-compliance with medications                              | 1         | 0.49    | 180                  | 87.80              |
| non-compliance with medicine                                 | 1         | 0.49    | 181                  | 88.29              |
| not following PT recommendation                              | 1         | 0.49    | 182                  | 88.78              |
| not following discharge recommendations                      | 1         | 0.49    | 183                  | 89.27              |

| : 1                                                          | Frequency | Percent | Cumulative Frequency | Cumulative Percent |
|--------------------------------------------------------------|-----------|---------|----------------------|--------------------|
| patient compliance                                           | 1         | 0.49    | 184                  | 89.76              |
| patient demographic                                          | 1         | 0.49    | 185                  | 90.24              |
| patient non-compliance with diet and meds and follow up with | 1         | 0.49    | 186                  | 90.73              |
| patient non-compliance with medication                       | 1         | 0.49    | 187                  | 91.22              |
| payor source--we have a high population of indigent patients | 1         | 0.49    | 188                  | 91.71              |
| poor communication between diciplines (mostly physicans)     | 1         | 0.49    | 189                  | 92.20              |
| poor coordination of services in the home environment        | 1         | 0.49    | 190                  | 92.68              |
| poor follow up                                               | 1         | 0.49    | 191                  | 93.17              |
| poor health literacy                                         | 1         | 0.49    | 192                  | 93.66              |
| poor medical follow up                                       | 1         | 0.49    | 193                  | 94.15              |
| poor medication management                                   | 1         | 0.49    | 194                  | 94.63              |
| premature discharge                                          | 1         | 0.49    | 195                  | 95.12              |
| pressure to discharge pts regardless of their status         | 1         | 0.49    | 196                  | 95.61              |
| primary care follow up not timely                            | 1         | 0.49    | 197                  | 96.10              |
| pt adherence                                                 | 1         | 0.49    | 198                  | 96.59              |
| pt's lack of social support                                  | 1         | 0.49    | 199                  | 97.07              |
| recommendations for snf, inpt rehab rejected by patient/ fam | 1         | 0.49    | 200                  | 97.56              |
| shortened length of stay in hospital                         | 1         | 0.49    | 201                  | 98.05              |
| social issues                                                | 1         | 0.49    | 202                  | 98.54              |
| subsequent exacerbation of disease                           | 1         | 0.49    | 203                  | 99.02              |
| undiagnosed psyciatric illness                               | 1         | 0.49    | 204                  | 99.51              |
| unrelated secondary illness                                  | 1         | 0.49    | 205                  | 100.00             |
|                                                              |           |         |                      |                    |

| :                                                                                   | Frequency | Percent | Cumulative Frequency | Cumulative Percent |
|-------------------------------------------------------------------------------------|-----------|---------|----------------------|--------------------|
| Access to continued therapy                                                         | 1         | 0.49    | 1                    | 0.49               |
| Access to services                                                                  | 1         | 0.49    | 2                    | 0.99               |
| Acquire new infection in the snf setting                                            | 1         | 0.49    | 3                    | 1.48               |
| Adherence to medications                                                            | 1         | 0.49    | 4                    | 1.97               |
| Age                                                                                 | 1         | 0.49    | 5                    | 2.46               |
| Being Discharged too Soon                                                           | 1         | 0.49    | 6                    | 2.96               |
| Complications at sub-acute facility                                                 | 1         | 0.49    | 7                    | 3.45               |
| Confusing discharge instructions                                                    | 1         | 0.49    | 8                    | 3.94               |
| Declining health                                                                    | 1         | 0.49    | 9                    | 4.43               |
| Delay in home care services starting up.                                            | 1         | 0.49    | 10                   | 4.93               |
| Dementia or altered mental status                                                   | 1         | 0.49    | 11                   | 5.42               |
| Did not understand discharge instructions provided                                  | 1         | 0.49    | 12                   | 5.91               |
| Discharge before patients are ready                                                 | 1         | 0.49    | 13                   | 6.40               |
| Discharge from hospital to home before pt is functionally ready                     | 1         | 0.49    | 14                   | 6.90               |
| Discharge plan by PT not followed                                                   | 1         | 0.49    | 15                   | 7.39               |
| Discharge quicker than patient stabilizes                                           | 1         | 0.49    | 16                   | 7.88               |
| Discharge to location other than that which was recommended                         | 1         | 0.49    | 17                   | 8.37               |
| Discharge too soon                                                                  | 2         | 0.99    | 19                   | 9.36               |
| Discontinuity of physical therapy care after discharge                              | 1         | 0.49    | 20                   | 9.85               |
| Dislocation                                                                         | 1         | 0.49    | 21                   | 10.34              |
| Don't follow PT recommendations for discharge location                              | 1         | 0.49    | 22                   | 10.84              |
| Early discharge                                                                     | 1         | 0.49    | 23                   | 11.33              |
| Easy to admit complex patients                                                      | 1         | 0.49    | 24                   | 11.82              |
| Facilities not will to take pt's with marginal social history                       | 1         | 0.49    | 25                   | 12.32              |
| Fall risk                                                                           | 1         | 0.49    | 26                   | 12.81              |
| Falls                                                                               | 3         | 1.48    | 29                   | 14.29              |
| Families overestimating their ability to provide care at home                       | 1         | 0.49    | 30                   | 14.78              |
| Families/caregivers unrealistic expectations of how much work it is to care for the | 1         | 0.49    | 31                   | 15.27              |
| Family doesn't follow recommendations of assist level/ recommended dc destination   | 1         | 0.49    | 32                   | 15.76              |
| Family respite needed                                                               | 1         | 0.49    | 33                   | 16.26              |
| Financial constraints guiding discharge                                             | 1         | 0.49    | 34                   | 16.75              |
| Financial resources                                                                 | 2         | 0.99    | 36                   | 17.73              |
| Follow up after DC                                                                  | 1         | 0.49    | 37                   | 18.23              |
| Getting and taking medication                                                       | 1         | 0.49    | 38                   | 18.72              |
| HF exacerbation                                                                     | 1         | 0.49    | 39                   | 19.21              |

| :                                                                                    | Frequency | Percent | Cumulative Frequency | Cumulative Percent |
|--------------------------------------------------------------------------------------|-----------|---------|----------------------|--------------------|
| Hospital acquired Pneumonia                                                          | 1         | 0.49    | 40                   | 19.70              |
| Inability to receive help at home                                                    | 1         | 0.49    | 41                   | 20.20              |
| Inadequate education/patient and family teaching                                     | 1         | 0.49    | 42                   | 20.69              |
| Inappropriate D/C disposition - insurance will not cover                             | 1         | 0.49    | 43                   | 21.18              |
| Insufficient family support in context of mobility and/or cognitive deficits         | 1         | 0.49    | 44                   | 21.67              |
| Insufficient patient and family education                                            | 1         | 0.49    | 45                   | 22.17              |
| Lack of communication between healthcare providers                                   | 1         | 0.49    | 46                   | 22.66              |
| Lack of communication in d/c planning process                                        | 1         | 0.49    | 47                   | 23.15              |
| Lack of education to patient                                                         | 1         | 0.49    | 48                   | 23.65              |
| Lack of education to patient/family                                                  | 1         | 0.49    | 49                   | 24.14              |
| Lack of education to patients and more importantly family members regarding both med | 1         | 0.49    | 50                   | 24.63              |
| Lack of follow-up                                                                    | 1         | 0.49    | 51                   | 25.12              |
| Lack of general functional mobility with Nursing staff                               | 1         | 0.49    | 52                   | 25.62              |
| Lack of home support                                                                 | 1         | 0.49    | 53                   | 26.11              |
| Lack of insurance approval for discharge recommendations                             | 1         | 0.49    | 54                   | 26.60              |
| Lack of management of medical co morbidities                                         | 1         | 0.49    | 55                   | 27.09              |
| Lack of outpatient follow up                                                         | 1         | 0.49    | 56                   | 27.59              |
| Lack of reinforcement by LIPs to patients re PT recs for safe D/C dispo              | 1         | 0.49    | 57                   | 28.08              |
| Lack of resources in community                                                       | 1         | 0.49    | 58                   | 28.57              |
| Lack of social support outside hospital                                              | 1         | 0.49    | 59                   | 29.06              |
| Lack of social supports                                                              | 1         | 0.49    | 60                   | 29.56              |
| Limited access to care                                                               | 1         | 0.49    | 61                   | 30.05              |
| Limited access to community health programs                                          | 1         | 0.49    | 62                   | 30.54              |
| Medication Mismanagement                                                             | 1         | 0.49    | 63                   | 31.03              |
| Medication errors                                                                    | 1         | 0.49    | 64                   | 31.53              |
| Mismatch between health literacy and instructiob                                     | 1         | 0.49    | 65                   | 32.02              |
| Mismatch between recommendations of therapists and patient's wishes (don't consent t | 1         | 0.49    | 66                   | 32.51              |
| No insurance                                                                         | 1         | 0.49    | 67                   | 33.00              |
| Non compliance with follow up                                                        | 1         | 0.49    | 68                   | 33.50              |
| Non-compliance                                                                       | 1         | 0.49    | 69                   | 33.99              |
| Noncompliance                                                                        | 2         | 0.99    | 71                   | 34.98              |
| Not enough patient education about importance of followup                            | 1         | 0.49    | 72                   | 35.47              |
| Not following therapists plan of care for length of stay                             | 1         | 0.49    | 73                   | 35.96              |
| Outside network providers                                                            | 1         | 0.49    | 74                   | 36.45              |
| Overuse of ER                                                                        | 1         | 0.49    | 75                   | 36.95              |



|                                                                                      | Frequency | Percent | Cumulative Frequency | Cumulative Percent |
|--------------------------------------------------------------------------------------|-----------|---------|----------------------|--------------------|
| Patient did not understand and follow recommendations                                | 1         | 0.49    | 76                   | 37.44              |
| Patient discharged before medically ready                                            | 1         | 0.49    | 77                   | 37.93              |
| Patient education                                                                    | 1         | 0.49    | 78                   | 38.42              |
| Patient has organ failure that is nearly end stage (CHF, CKD, etc.) and medical mana | 1         | 0.49    | 79                   | 38.92              |
| Patient initially refused a SNF placement but was not safe to be at home.            | 1         | 0.49    | 80                   | 39.41              |
| Patient non compliant with recommendations                                           | 1         | 0.49    | 81                   | 39.90              |
| Patient non-compliance                                                               | 1         | 0.49    | 82                   | 40.39              |
| Patient non-compliance with recommendations                                          | 1         | 0.49    | 83                   | 40.89              |
| Patient noncompliance with follow up                                                 | 1         | 0.49    | 84                   | 41.38              |
| Patient noncompliance with post acute care medications or treatments                 | 1         | 0.49    | 85                   | 41.87              |
| Patient not getting prescriptions filled/taking meds                                 | 1         | 0.49    | 86                   | 42.36              |
| Patient refusal of d/c recommendations                                               | 1         | 0.49    | 87                   | 42.86              |
| Patient's ability to understand their own medical condition                          | 1         | 0.49    | 88                   | 43.35              |
| Patient's insurance dictating discharge placement                                    | 1         | 0.49    | 89                   | 43.84              |
| Patient's lack of resources                                                          | 1         | 0.49    | 90                   | 44.33              |
| Patient/family going against therapy disch recommendations                           | 1         | 0.49    | 91                   | 44.83              |
| Patients not dosed effectively with exercises in subacute rehabs                     | 1         | 0.49    | 92                   | 45.32              |
| Patients not following recommendations                                               | 1         | 0.49    | 93                   | 45.81              |
| Patients not following up with recommended providers                                 | 1         | 0.49    | 94                   | 46.31              |
| Patients not getting exercise via nursing assistance once they are cleared from PT b | 1         | 0.49    | 95                   | 46.80              |
| Patients refusing the level of care recommended by PT/OT                             | 1         | 0.49    | 96                   | 47.29              |
| Patients unable to pay for medications                                               | 1         | 0.49    | 97                   | 47.78              |
| Patients with complex, chronic needs not understanding recommendations for homegoing | 1         | 0.49    | 98                   | 48.28              |
| Physician and system practice patterns                                               | 1         | 0.49    | 99                   | 48.77              |
| Physicians disregard recommendations of PT and OT                                    | 1         | 0.49    | 100                  | 49.26              |
| Poor cognitive function                                                              | 1         | 0.49    | 101                  | 49.75              |
| Poor coomunication of instructions of d/c instuctions                                | 1         | 0.49    | 102                  | 50.25              |
| Poor family support                                                                  | 1         | 0.49    | 103                  | 50.74              |
| Poor family support- just want patient resources                                     | 1         | 0.49    | 104                  | 51.23              |
| Poor follow post-discharge                                                           | 1         | 0.49    | 105                  | 51.72              |
| Poor follow up                                                                       | 1         | 0.49    | 106                  | 52.22              |
| Poor patient adherence                                                               | 1         | 0.49    | 107                  | 52.71              |
| Poor patient compliance with recommendations                                         | 1         | 0.49    | 108                  | 53.20              |
| Poor social support                                                                  | 1         | 0.49    | 109                  | 53.69              |
| Population without PCP                                                               | 1         | 0.49    | 110                  | 54.19              |

| :                                                                                    | Frequency | Percent | Cumulative Frequency | Cumulative Percent |
|--------------------------------------------------------------------------------------|-----------|---------|----------------------|--------------------|
| Practice of defensive medicine                                                       | 1         | 0.49    | 111                  | 54.68              |
| Premature discharge                                                                  | 1         | 0.49    | 112                  | 55.17              |
| Private physicians that are not on board with continuu of care                       | 1         | 0.49    | 113                  | 55.67              |
| Pts initial plan was to go home but after few days got SOB even if it is coordinated | 1         | 0.49    | 114                  | 56.16              |
| Pts not using equipment appropriately                                                | 1         | 0.49    | 115                  | 56.65              |
| Push for decreased length of stay (patients d/c too soon)                            | 1         | 0.49    | 116                  | 57.14              |
| Quick Discharges                                                                     | 1         | 0.49    | 117                  | 57.64              |
| Refusal of patient to accept recommended discharge                                   | 1         | 0.49    | 118                  | 58.13              |
| Self care ability                                                                    | 1         | 0.49    | 119                  | 58.62              |
| Social support                                                                       | 1         | 0.49    | 120                  | 59.11              |
| Socioeconomic status (homeless population)                                           | 1         | 0.49    | 121                  | 59.61              |
| Staff/patient/caregiver communication                                                | 1         | 0.49    | 122                  | 60.10              |
| Too early discharge initially                                                        | 1         | 0.49    | 123                  | 60.59              |
| Unavailability of caregiver                                                          | 1         | 0.49    | 124                  | 61.08              |
| Uninsured or underinsured (post-acute services not covered)                          | 1         | 0.49    | 125                  | 61.58              |
| access to primary care physicians following discharge                                | 1         | 0.49    | 126                  | 62.07              |
| acknowledging therapy's recommendations for discharge                                | 1         | 0.49    | 127                  | 62.56              |
| chronic conditions                                                                   | 1         | 0.49    | 128                  | 63.05              |
| co-morbidity                                                                         | 1         | 0.49    | 129                  | 63.55              |
| cognition                                                                            | 1         | 0.49    | 130                  | 64.04              |
| cognitive impairment                                                                 | 1         | 0.49    | 131                  | 64.53              |
| community acquired infections                                                        | 1         | 0.49    | 132                  | 65.02              |
| complications/recurrence of symptoms (e.g., CHF)                                     | 1         | 0.49    | 133                  | 65.52              |
| compromise d/c plan b/c of insurance constraints                                     | 1         | 0.49    | 134                  | 66.01              |
| decreased patient motivation                                                         | 1         | 0.49    | 135                  | 66.50              |
| decreased understanding of patient how to manage themselves at home                  | 1         | 0.49    | 136                  | 67.00              |
| delay in home care services (both nursing and PT                                     | 1         | 0.49    | 137                  | 67.49              |
| discharge home and not to recommended discharge location (eg subacute rehab, acute r | 1         | 0.49    | 138                  | 67.98              |
| discharge to inappropriate level of care based on functional status of pt            | 1         | 0.49    | 139                  | 68.47              |
| discharge to non- recommended level of care                                          | 1         | 0.49    | 140                  | 68.97              |
| early discharge                                                                      | 1         | 0.49    | 141                  | 69.46              |
| failure to heed PT recommendations                                                   | 1         | 0.49    | 142                  | 69.95              |
| falls                                                                                | 1         | 0.49    | 143                  | 70.44              |
| families / patient not following recommendations                                     | 1         | 0.49    | 144                  | 70.94              |
| family/social support                                                                | 1         | 0.49    | 145                  | 71.43              |

| : 2                                                                                  | Frequency | Percent | Cumulative Frequency | Cumulative Percent |
|--------------------------------------------------------------------------------------|-----------|---------|----------------------|--------------------|
| follow up by the physician or a primary care provider after dc                       | 1         | 0.49    | 146                  | 71.92              |
| generic d/c instructions - no room for PT activity recs.                             | 1         | 0.49    | 147                  | 72.41              |
| health literacy                                                                      | 1         | 0.49    | 148                  | 72.91              |
| improving- but not discharging from ED                                               | 1         | 0.49    | 149                  | 73.40              |
| inappropriate post acute care                                                        | 1         | 0.49    | 150                  | 73.89              |
| inappropriate discharge                                                              | 1         | 0.49    | 151                  | 74.38              |
| incomplete medical management                                                        | 1         | 0.49    | 152                  | 74.88              |
| inconsistent compliance with medications                                             | 1         | 0.49    | 153                  | 75.37              |
| insurance denials/pre-certification process when therapy recommends IP rehab and pt  | 1         | 0.49    | 154                  | 75.86              |
| insurance limitations on LOS and care post d/c                                       | 1         | 0.49    | 155                  | 76.35              |
| knowledge deficit of post acute providers                                            | 1         | 0.49    | 156                  | 76.85              |
| lack of access to medical providers/clinics                                          | 1         | 0.49    | 157                  | 77.34              |
| lack of communication with discharge destination                                     | 1         | 0.49    | 158                  | 77.83              |
| lack of coordination of care                                                         | 1         | 0.49    | 159                  | 78.33              |
| lack of exercise/education programs like cardiopulm rehab                            | 1         | 0.49    | 160                  | 78.82              |
| lack of follow through on meds                                                       | 1         | 0.49    | 161                  | 79.31              |
| lack of patient compliance                                                           | 1         | 0.49    | 162                  | 79.80              |
| lack of patient education                                                            | 1         | 0.49    | 163                  | 80.30              |
| lack of patient resources                                                            | 1         | 0.49    | 164                  | 80.79              |
| lack of resources                                                                    | 1         | 0.49    | 165                  | 81.28              |
| lack of understanding of medication use                                              | 1         | 0.49    | 166                  | 81.77              |
| long term chronic conditions that patient's "handle at home" without adequate servic | 1         | 0.49    | 167                  | 82.27              |
| malnutrition                                                                         | 1         | 0.49    | 168                  | 82.76              |
| medical literacy deficits                                                            | 1         | 0.49    | 169                  | 83.25              |
| medication (mis-)managment                                                           | 1         | 0.49    | 170                  | 83.74              |
| medication management                                                                | 1         | 0.49    | 171                  | 84.24              |
| medication non-adherence or mal-adherence                                            | 1         | 0.49    | 172                  | 84.73              |
| medication not available                                                             | 1         | 0.49    | 173                  | 85.22              |
| multiple medical issues--one team decices the patient is ready, but another may not  | 1         | 0.49    | 174                  | 85.71              |
| non compliance with medications or follow up                                         | 1         | 0.49    | 175                  | 86.21              |
| non compliance with recommended diet                                                 | 1         | 0.49    | 176                  | 86.70              |
| non-compliance with follow up with primary physician                                 | 1         | 0.49    | 177                  | 87.19              |
| non-compliance with medications                                                      | 1         | 0.49    | 178                  | 87.68              |
| noncompliance                                                                        | 1         | 0.49    | 179                  | 88.18              |
| not following discharge recommendations due to insurance limitations                 | 1         | 0.49    | 180                  | 88.67              |

| : 2                                                                                  | Frequency | Percent | Cumulative Frequency | Cumulative Percent |
|--------------------------------------------------------------------------------------|-----------|---------|----------------------|--------------------|
| not quite medically ready to be discharged                                           | 1         | 0.49    | 181                  | 89.16              |
| not understanding discharge plan                                                     | 1         | 0.49    | 182                  | 89.66              |
| over treatment by the medical community; COPD/CHF/CRF treated way beyond capacity fo | 1         | 0.49    | 183                  | 90.15              |
| patient compliance and co-morbidity factors                                          | 1         | 0.49    | 184                  | 90.64              |
| patient preference and request to return                                             | 1         | 0.49    | 185                  | 91.13              |
| patient refusal to go to recommended level of post-acute care (ie SNF, LTC)          | 1         | 0.49    | 186                  | 91.63              |
| patientS very ill relatively near death could be hospice but still at home full code | 1         | 0.49    | 187                  | 92.12              |
| patients identified who should no longer be in home environment alone but who are ow | 1         | 0.49    | 188                  | 92.61              |
| physician insistence on a discharge setting despite recommendation                   | 1         | 0.49    | 189                  | 93.10              |
| poor education from MD and nursing regarding medical problems                        | 1         | 0.49    | 190                  | 93.60              |
| poor functional status at time of d/c                                                | 1         | 0.49    | 191                  | 94.09              |
| poor initial D/C plan/placement                                                      | 1         | 0.49    | 192                  | 94.58              |
| poor patient compliance                                                              | 1         | 0.49    | 193                  | 95.07              |
| poor support systems to patients/families                                            | 1         | 0.49    | 194                  | 95.57              |
| pt / CG cognition (ability to follow directions/make good choices)                   | 1         | 0.49    | 195                  | 96.06              |
| pt non-compliance with tx recommendations                                            | 1         | 0.49    | 196                  | 96.55              |
| re-occurring illness                                                                 | 1         | 0.49    | 197                  | 97.04              |
| recommendations not followed                                                         | 1         | 0.49    | 198                  | 97.54              |
| rush the discharge to the first accepting facility, not the best fit for the patient | 1         | 0.49    | 199                  | 98.03              |
| shortened length of stay (esp post-op backs)                                         | 1         | 0.49    | 200                  | 98.52              |
| socioeconomic situation                                                              | 1         | 0.49    | 201                  | 99.01              |
| unclear/limited resources at home for pt                                             | 1         | 0.49    | 202                  | 99.51              |
| wound infection                                                                      | 1         | 0.49    | 203                  | 100.00             |
|                                                                                      |           |         |                      |                    |

| : 3                                                                      | Frequency | Percent | Cumulative Frequency | Cumulative Percent |
|--------------------------------------------------------------------------|-----------|---------|----------------------|--------------------|
| "observation status"                                                     | 1         | 0.53    | 1                    | 0.53               |
| Ability to share documentation outside organization                      | 1         | 0.53    | 2                    | 1.06               |
| Access to PCP                                                            | 1         | 0.53    | 3                    | 1.59               |
| Actual discharge location does not equal recommended discharge location  | 1         | 0.53    | 4                    | 2.12               |
| Admission diagnosis not optimally managed prior to discharge             | 1         | 0.53    | 5                    | 2.65               |
| Appropriate access to medications                                        | 1         | 0.53    | 6                    | 3.17               |
| At risk comorbidities                                                    | 1         | 0.53    | 7                    | 3.70               |
| Bias v. Drug abusers, homeless and obese                                 | 1         | 0.53    | 8                    | 4.23               |
| COPD exacerbation                                                        | 1         | 0.53    | 9                    | 4.76               |
| Chronic conditions                                                       | 1         | 0.53    | 10                   | 5.29               |
| Chronic illnesses that some patients have difficulty managing at home (i | 1         | 0.53    | 11                   | 5.82               |
| Chronic medical issues/comorbidities                                     | 1         | 0.53    | 12                   | 6.35               |
| Chronicity and instability of medical condition (ETOH, COPD and CHF)     | 1         | 0.53    | 13                   | 6.88               |
| Communication PT-patient regarding discharge education                   | 1         | 0.53    | 14                   | 7.41               |
| Comorbidity                                                              | 1         | 0.53    | 15                   | 7.94               |
| Complications from lack of mobility(pneumonia, ulcers)                   | 1         | 0.53    | 16                   | 8.47               |
| Conservative care in snfs                                                | 1         | 0.53    | 17                   | 8.99               |
| D/c Recs from therapy being ignored                                      | 1         | 0.53    | 18                   | 9.52               |
| Discharged prior to being medically stable                               | 1         | 0.53    | 19                   | 10.05              |
| Discharged to destination other than that which was recommended by PT    | 1         | 0.53    | 20                   | 10.58              |
| Drug abuse                                                               | 1         | 0.53    | 21                   | 11.11              |
| Drug and alcohol-related complications                                   | 1         | 0.53    | 22                   | 11.64              |
| Drug interactions                                                        | 1         | 0.53    | 23                   | 12.17              |
| Dvt                                                                      | 1         | 0.53    | 24                   | 12.70              |
| Early discharge                                                          | 1         | 0.53    | 25                   | 13.23              |
| Exacerbation of chronic illness                                          | 1         | 0.53    | 26                   | 13.76              |
| Facilities not willing to take pts with jx of substance abuse            | 1         | 0.53    | 27                   | 14.29              |
| Failure to follow up with physician                                      | 1         | 0.53    | 28                   | 14.81              |
| Fall                                                                     | 1         | 0.53    | 29                   | 15.34              |
| Fall risk                                                                | 1         | 0.53    | 30                   | 15.87              |
| Falls                                                                    | 1         | 0.53    | 31                   | 16.40              |
| Family preferences/ belief systems                                       | 1         | 0.53    | 32                   | 16.93              |
| Hidden Medical information in complex charting systems                   | 1         | 0.53    | 33                   | 17.46              |
| Inability of family to provide enough care/assistance                    | 1         | 0.53    | 34                   | 17.99              |
| Inability to see PCP for follow up and further med adjustments           | 1         | 0.53    | 35                   | 18.52              |

| : 3                                                                      | Frequency | Percent | Cumulative Frequency | Cumulative Percent |
|--------------------------------------------------------------------------|-----------|---------|----------------------|--------------------|
| Inadequate follow up post discharge                                      | 1         | 0.53    | 36                   | 19.05              |
| Insurance denial of appropriate level of post-DC care                    | 1         | 0.53    | 37                   | 19.58              |
| Insurance denial of post acute care rehab forcing patients home          | 1         | 0.53    | 38                   | 20.11              |
| Lack of access to services                                               | 1         | 0.53    | 39                   | 20.63              |
| Lack of adequate insurance                                               | 1         | 0.53    | 40                   | 21.16              |
| Lack of appropriate medical follow up post-DC                            | 1         | 0.53    | 41                   | 21.69              |
| Lack of communication between disciplines prior to discharge             | 1         | 0.53    | 42                   | 22.22              |
| Lack of continuum of care                                                | 1         | 0.53    | 43                   | 22.75              |
| Lack of education regarding safety at home                               | 1         | 0.53    | 44                   | 23.28              |
| Lack of family etc.support post discharge                                | 1         | 0.53    | 45                   | 23.81              |
| Lack of family support                                                   | 3         | 1.59    | 48                   | 25.40              |
| Lack of follow through of recommendations made by Rehab team -e.g. going | 1         | 0.53    | 49                   | 25.93              |
| Lack of followup information                                             | 1         | 0.53    | 50                   | 26.46              |
| Lack of housing                                                          | 1         | 0.53    | 51                   | 26.98              |
| Lack of insurance (CMS) coverage                                         | 1         | 0.53    | 52                   | 27.51              |
| Lack of insurance coverage                                               | 1         | 0.53    | 53                   | 28.04              |
| Lack of patient accountability with d/c plan... Noncompliance            | 1         | 0.53    | 54                   | 28.57              |
| Level of education of patient i.e. ability to discern need to pursue tre | 1         | 0.53    | 55                   | 29.10              |
| Loss of information to other providers after discharge                   | 1         | 0.53    | 56                   | 29.63              |
| Low health literacy                                                      | 1         | 0.53    | 57                   | 30.16              |
| MD's not listening to our recommendations                                | 1         | 0.53    | 58                   | 30.69              |
| Medical complexity of patients                                           | 1         | 0.53    | 59                   | 31.22              |
| Medical discharge too soon                                               | 1         | 0.53    | 60                   | 31.75              |
| Medically complex patients                                               | 1         | 0.53    | 61                   | 32.28              |
| Medication errors                                                        | 1         | 0.53    | 62                   | 32.80              |
| Medication mismanagement                                                 | 1         | 0.53    | 63                   | 33.33              |
| Minimal doctor and nursing respect for therapist input in patient assess | 1         | 0.53    | 64                   | 33.86              |
| No support system at home                                                | 1         | 0.53    | 65                   | 34.39              |
| Non compliance with dc recs                                              | 1         | 0.53    | 66                   | 34.92              |
| Non compliant with medications                                           | 1         | 0.53    | 67                   | 35.45              |
| Non-compliance (i.e. COPD, HF)                                           | 1         | 0.53    | 68                   | 35.98              |
| Noncompliance                                                            | 1         | 0.53    | 69                   | 36.51              |
| Not following therapist discharge recommendations (i.e. sending patients | 1         | 0.53    | 70                   | 37.04              |
| PCP does not follow discharge recommendations                            | 1         | 0.53    | 71                   | 37.57              |
| PT & OT discharge recommendations not followed                           | 1         | 0.53    | 72                   | 38.10              |

| : 3                                                                       | Frequency | Percent | Cumulative Frequency | Cumulative Percent |
|---------------------------------------------------------------------------|-----------|---------|----------------------|--------------------|
| Patient compliance                                                        | 1         | 0.53    | 73                   | 38.62              |
| Patient discharged with suboptimal education on readmission risk          | 1         | 0.53    | 74                   | 39.15              |
| Patient financial means to pay for care                                   | 1         | 0.53    | 75                   | 39.68              |
| Patient noncompliance with oxygen needs, medication instructions, etc.    | 1         | 0.53    | 76                   | 40.21              |
| Patient was recommended inpatient rehab or skilled nursing facility. Pat  | 1         | 0.53    | 77                   | 40.74              |
| Patient's financial status                                                | 1         | 0.53    | 78                   | 41.27              |
| Patient's low health literacy                                             | 1         | 0.53    | 79                   | 41.80              |
| Patient/Caregiver Not Always Understanding Instructions Despite Being Ed  | 1         | 0.53    | 80                   | 42.33              |
| Patients disregarding discharge disposition recommendations               | 1         | 0.53    | 81                   | 42.86              |
| Patients prefer hospital more than home- like a hotel                     | 1         | 0.53    | 82                   | 43.39              |
| Patients resistance to rehab                                              | 1         | 0.53    | 83                   | 43.92              |
| Patients unwilling to recognize that home is not the safest option for t  | 1         | 0.53    | 84                   | 44.44              |
| Physicians are not held financially accountable, so they don't care about | 1         | 0.53    | 85                   | 44.97              |
| Physicians not able to fix problem                                        | 1         | 0.53    | 86                   | 45.50              |
| Physicians select poor candidates for surgeries/interventions, and the p  | 1         | 0.53    | 87                   | 46.03              |
| Poor compliance w meds                                                    | 1         | 0.53    | 88                   | 46.56              |
| Poor d/c option                                                           | 1         | 0.53    | 89                   | 47.09              |
| Poor family support                                                       | 1         | 0.53    | 90                   | 47.62              |
| Poor follow through by pt's re overall medical care/ recs                 | 1         | 0.53    | 91                   | 48.15              |
| Poor follow up after discharge from hospital - to MD. many contributing   | 1         | 0.53    | 92                   | 48.68              |
| Poor functional endurance/ limited functional reserve in context of medi  | 1         | 0.53    | 93                   | 49.21              |
| Poor identification of social factors (finances, housing, transportation  | 1         | 0.53    | 94                   | 49.74              |
| Poor patient adherence to plan                                            | 1         | 0.53    | 95                   | 50.26              |
| Poor wound management                                                     | 1         | 0.53    | 96                   | 50.79              |
| Post hospital syndrome                                                    | 1         | 0.53    | 97                   | 51.32              |
| Post-op infection/PNA/DVT                                                 | 1         | 0.53    | 98                   | 51.85              |
| Progression of other Medical comorbidities                                | 1         | 0.53    | 99                   | 52.38              |
| Recommended services not set up                                           | 1         | 0.53    | 100                  | 52.91              |
| Recurrence of chronic medical conditions such as CHF, COPD                | 1         | 0.53    | 101                  | 53.44              |
| Remote program for CHF monitoring ("Heartlink") failed due to financial   | 1         | 0.53    | 102                  | 53.97              |
| Repeat falls                                                              | 1         | 0.53    | 103                  | 54.50              |
| SNF providing too low an intensity of PT such that pt regresses from the  | 1         | 0.53    | 104                  | 55.03              |
| Sepsis                                                                    | 1         | 0.53    | 105                  | 55.56              |
| Short length of stay                                                      | 1         | 0.53    | 106                  | 56.08              |
| Social issues                                                             | 1         | 0.53    | 107                  | 56.61              |

| : 3                                                                      | Frequency | Percent | Cumulative Frequency | Cumulative Percent |
|--------------------------------------------------------------------------|-----------|---------|----------------------|--------------------|
| Social support                                                           | 2         | 1.06    | 109                  | 57.67              |
| Too many cooks at the kettle                                             | 1         | 0.53    | 110                  | 58.20              |
| Treatment non-compliance                                                 | 1         | 0.53    | 111                  | 58.73              |
| Volume to process patients                                               | 1         | 0.53    | 112                  | 59.26              |
| access to resources                                                      | 1         | 0.53    | 113                  | 59.79              |
| accessible housing to come and go                                        | 1         | 0.53    | 114                  | 60.32              |
| acuity at admission                                                      | 1         | 0.53    | 115                  | 60.85              |
| availability of SNF and IRF beds                                         | 1         | 0.53    | 116                  | 61.38              |
| care to high for at home caregivers                                      | 1         | 0.53    | 117                  | 61.90              |
| chronic health issues/co-morbidities                                     | 1         | 0.53    | 118                  | 62.43              |
| compliance                                                               | 1         | 0.53    | 119                  | 62.96              |
| d/c plan not followed, usually pt refusal                                | 1         | 0.53    | 120                  | 63.49              |
| daily weights with CHF                                                   | 1         | 0.53    | 121                  | 64.02              |
| decline in status due to multiple medical conditions/co-morbidities      | 1         | 0.53    | 122                  | 64.55              |
| deconditioning                                                           | 1         | 0.53    | 123                  | 65.08              |
| decreased ability to get medications or lack of understanding of medicat | 1         | 0.53    | 124                  | 65.61              |
| decreased functional mobility                                            | 1         | 0.53    | 125                  | 66.14              |
| decreased intensity of rehab                                             | 1         | 0.53    | 126                  | 66.67              |
| decreased understanding of medication changes                            | 1         | 0.53    | 127                  | 67.20              |
| discharge prior to managing medical problem causing admission            | 1         | 0.53    | 128                  | 67.72              |
| discharge to inappropriate level of care based on medical issues         | 1         | 0.53    | 129                  | 68.25              |
| education level                                                          | 1         | 0.53    | 130                  | 68.78              |
| expected progression of chronic illness/disease process                  | 1         | 0.53    | 131                  | 69.31              |
| failure to consult PT                                                    | 1         | 0.53    | 132                  | 69.84              |
| failure to thrive                                                        | 1         | 0.53    | 133                  | 70.37              |
| financial                                                                | 1         | 0.53    | 134                  | 70.90              |
| financial barriers                                                       | 1         | 0.53    | 135                  | 71.43              |
| following recommendation to reduce risks                                 | 1         | 0.53    | 136                  | 71.96              |
| high % of low economic clients                                           | 1         | 0.53    | 137                  | 72.49              |
| high acuity of patient at d/c                                            | 1         | 0.53    | 138                  | 73.02              |
| high density chronic disease                                             | 1         | 0.53    | 139                  | 73.54              |
| home care doesn't show up                                                | 1         | 0.53    | 140                  | 74.07              |
| horrible continuity of care; one hand doesn't know what the other is doi | 1         | 0.53    | 141                  | 74.60              |
| illness not being well managed before leaving                            | 1         | 0.53    | 142                  | 75.13              |
| inadequate therapy frequency and intensity while in the acute hospital f | 1         | 0.53    | 143                  | 75.66              |



| : 3                                                                      | Frequency | Percent | Cumulative Frequency | Cumulative Percent |
|--------------------------------------------------------------------------|-----------|---------|----------------------|--------------------|
| inappropriate discharge placements                                       | 1         | 0.53    | 144                  | 76.19              |
| increasing safety with mobility while inpatient so the patient is better | 1         | 0.53    | 145                  | 76.72              |
| insurance issues/lack of benefits                                        | 1         | 0.53    | 146                  | 77.25              |
| lack of access to care                                                   | 1         | 0.53    | 147                  | 77.78              |
| lack of adequate follow-up services                                      | 1         | 0.53    | 148                  | 78.31              |
| lack of carry over from hospital to home in multiple areas--activities,  | 1         | 0.53    | 149                  | 78.84              |
| lack of family support                                                   | 1         | 0.53    | 150                  | 79.37              |
| lack of follow up                                                        | 1         | 0.53    | 151                  | 79.89              |
| lack of insurance                                                        | 1         | 0.53    | 152                  | 80.42              |
| lack of medical follow up/resources                                      | 1         | 0.53    | 153                  | 80.95              |
| lack of proper follow up (patient factor)                                | 1         | 0.53    | 154                  | 81.48              |
| lack of pt education how to prevent readmission                          | 1         | 0.53    | 155                  | 82.01              |
| lack of social support                                                   | 1         | 0.53    | 156                  | 82.54              |
| lack of support/education to facilitate change in habits for those deali | 1         | 0.53    | 157                  | 83.07              |
| limitations in resources                                                 | 1         | 0.53    | 158                  | 83.60              |
| limitations to post-d/c medical management                               | 1         | 0.53    | 159                  | 84.13              |
| limited understanding of underlying medical issues                       | 1         | 0.53    | 160                  | 84.66              |
| medication management                                                    | 1         | 0.53    | 161                  | 85.19              |
| multiple medical issues under the control of too many MDs--nobody lookin | 1         | 0.53    | 162                  | 85.71              |
| need for more community navigators                                       | 1         | 0.53    | 163                  | 86.24              |
| no follow up calls                                                       | 1         | 0.53    | 164                  | 86.77              |
| non compliance with medications                                          | 1         | 0.53    | 165                  | 87.30              |
| non-compliant with use of assistive devices                              | 1         | 0.53    | 166                  | 87.83              |
| nonadherence                                                             | 1         | 0.53    | 167                  | 88.36              |
| not following PT d/c recommendations                                     | 1         | 0.53    | 168                  | 88.89              |
| patient doesn't have support system                                      | 1         | 0.53    | 169                  | 89.42              |
| patient knowledge deficit re medications                                 | 1         | 0.53    | 170                  | 89.95              |
| patient motivation and goals                                             | 1         | 0.53    | 171                  | 90.48              |
| patient non-compliance                                                   | 2         | 1.06    | 173                  | 91.53              |
| patient/family anxiety, mental health                                    | 1         | 0.53    | 174                  | 92.06              |
| patients are very ill. Too expensive to provide adequate support for all | 1         | 0.53    | 175                  | 92.59              |
| patients who have difficulty with eating/ swallowing issues who do not f | 1         | 0.53    | 176                  | 93.12              |
| poor access to community nursing                                         | 1         | 0.53    | 177                  | 93.65              |
| poor ccoordination services                                              | 1         | 0.53    | 178                  | 94.18              |
| poor compliance with discharge recommendations                           | 1         | 0.53    | 179                  | 94.71              |

| : 3                                                                      | Frequency | Percent | Cumulative Frequency | Cumulative Percent |
|--------------------------------------------------------------------------|-----------|---------|----------------------|--------------------|
| poor discharge planning not listening to therapists family refusal to fo | 1         | 0.53    | 180                  | 95.24              |
| poor follow with PCPs                                                    | 1         | 0.53    | 181                  | 95.77              |
| poor insight on part of pt/caregivers about what will be required to car | 1         | 0.53    | 182                  | 96.30              |
| poor/inconsistent follow through by pt at home                           | 1         | 0.53    | 183                  | 96.83              |
| poverty                                                                  | 1         | 0.53    | 184                  | 97.35              |
| shorter LOS                                                              | 1         | 0.53    | 185                  | 97.88              |
| sickly pts                                                               | 1         | 0.53    | 186                  | 98.41              |
| social issues                                                            | 1         | 0.53    | 187                  | 98.94              |
| specialization of medicine with lack of gatekeeper who can thoroughly in | 1         | 0.53    | 188                  | 99.47              |
| the nature of chronic diseases                                           | 1         | 0.53    | 189                  | 100.00             |
|                                                                          |           |         |                      |                    |

| : 4                                                | Frequency | Percent | Cumulative Frequency | Cumulative Percent |
|----------------------------------------------------|-----------|---------|----------------------|--------------------|
| Admitted for inappropriate reasons                 | 1         | 0.65    | 1                    | 0.65               |
| All medical issues not addressed as IP             | 1         | 0.65    | 2                    | 1.30               |
| Cardiac issues                                     | 1         | 0.65    | 3                    | 1.95               |
| Caregiver education regarding red flags            | 1         | 0.65    | 4                    | 2.60               |
| Cognition                                          | 1         | 0.65    | 5                    | 3.25               |
| Comorbidities                                      | 1         | 0.65    | 6                    | 3.90               |
| Confusion                                          | 1         | 0.65    | 7                    | 4.55               |
| Decline in function                                | 1         | 0.65    | 8                    | 5.19               |
| Decline of pt to agree to go to the recommended di | 1         | 0.65    | 9                    | 5.84               |
| Delay of home health services seeing Pt. after d/c | 1         | 0.65    | 10                   | 6.49               |
| Discharge to streets or shelter                    | 1         | 0.65    | 11                   | 7.14               |
| Discharged from hospital too early                 | 1         | 0.65    | 12                   | 7.79               |
| Don't follow up with pts after discharge           | 1         | 0.65    | 13                   | 8.44               |
| Drug and alcohol abuse, or mental health/addiction | 1         | 0.65    | 14                   | 9.09               |
| Dumping by NH                                      | 1         | 0.65    | 15                   | 9.74               |
| Failure at home                                    | 1         | 0.65    | 16                   | 10.39              |
| Failure to follow d/c recs                         | 1         | 0.65    | 17                   | 11.04              |
| Fall risk with decreased balance not addressed     | 1         | 0.65    | 18                   | 11.69              |
| Falls                                              | 1         | 0.65    | 19                   | 12.34              |
| Families overwhelmed                               | 1         | 0.65    | 20                   | 12.99              |
| Family/caregivers do not follow discharge recommen | 1         | 0.65    | 21                   | 13.64              |
| Habitual patients                                  | 1         | 0.65    | 22                   | 14.29              |
| Homelessness                                       | 1         | 0.65    | 23                   | 14.94              |
| Huddle on a case when it becomes difficult vs bein | 1         | 0.65    | 24                   | 15.58              |
| I work at a military hospital where patients pay n | 1         | 0.65    | 25                   | 16.23              |
| Inadequate support at home                         | 1         | 0.65    | 26                   | 16.88              |
| Inappropriate services available at home to assist | 1         | 0.65    | 27                   | 17.53              |
| Insurance issues - pt's come to ER unnecessarily   | 1         | 0.65    | 28                   | 18.18              |
| Lack of adequate health insurance                  | 1         | 0.65    | 29                   | 18.83              |
| Lack of attendance at f/u appointments             | 1         | 0.65    | 30                   | 19.48              |
| Lack of consideration by provider of ALL the patie | 1         | 0.65    | 31                   | 20.13              |
| Lack of family support                             | 1         | 0.65    | 32                   | 20.78              |
| Lack of family/community support                   | 1         | 0.65    | 33                   | 21.43              |
| Lack of functional standardized tests in acute car | 1         | 0.65    | 34                   | 22.08              |
| Lack of home safety evaluation                     | 1         | 0.65    | 35                   | 22.73              |

| : 4                                                | Frequency | Percent | Cumulative Frequency | Cumulative Percent |
|----------------------------------------------------|-----------|---------|----------------------|--------------------|
| Lack of resources                                  | 1         | 0.65    | 36                   | 23.38              |
| Lack of resources at home                          | 1         | 0.65    | 37                   | 24.03              |
| Lack of resources for patient after d/c            | 1         | 0.65    | 38                   | 24.68              |
| Lack of therapists in Home health                  | 1         | 0.65    | 39                   | 25.32              |
| Limited access to home health/outpatient services  | 1         | 0.65    | 40                   | 25.97              |
| MDs going against rehab recs for DC                | 1         | 0.65    | 41                   | 26.62              |
| Medical complication                               | 1         | 0.65    | 42                   | 27.27              |
| Medical noncompliance                              | 1         | 0.65    | 43                   | 27.92              |
| Medication errors by patient                       | 1         | 0.65    | 44                   | 28.57              |
| Medication mismanagement/ polypharmacy             | 1         | 0.65    | 45                   | 29.22              |
| Misdiagnosed                                       | 1         | 0.65    | 46                   | 29.87              |
| Misunderstanding of amount of care that family wil | 1         | 0.65    | 47                   | 30.52              |
| No support in community                            | 1         | 0.65    | 48                   | 31.17              |
| Non- referrals for PT/OT/ST                        | 1         | 0.65    | 49                   | 31.82              |
| Not following recommended discharge plan- refusal  | 1         | 0.65    | 50                   | 32.47              |
| Not sure                                           | 1         | 0.65    | 51                   | 33.12              |
| Nutrition issues                                   | 1         | 0.65    | 52                   | 33.77              |
| Ongoing chronic medical problems                   | 2         | 1.30    | 54                   | 35.06              |
| Overly cautious staff at SNF/rehab/home care refer | 1         | 0.65    | 55                   | 35.71              |
| Overstate available assist at home                 | 1         | 0.65    | 56                   | 36.36              |
| Pain                                               | 2         | 1.30    | 58                   | 37.66              |
| Patient anxiety                                    | 1         | 0.65    | 59                   | 38.31              |
| Patient did not keep follow up appt                | 1         | 0.65    | 60                   | 38.96              |
| Patient discharged without follow up care plans in | 1         | 0.65    | 61                   | 39.61              |
| Patient doesn't understand or doesn't follow disch | 1         | 0.65    | 62                   | 40.26              |
| Patient feels they cannot take care of themselves  | 1         | 0.65    | 63                   | 40.91              |
| Patient fell at home                               | 1         | 0.65    | 64                   | 41.56              |
| Patient non-compliance                             | 1         | 0.65    | 65                   | 42.21              |
| Patient non-compliance, not following recommendati | 1         | 0.65    | 66                   | 42.86              |
| Patient preference                                 | 1         | 0.65    | 67                   | 43.51              |
| Patient/caregiver noncompliance with discharge rec | 1         | 0.65    | 68                   | 44.16              |
| Patients being discharged sooner than advisable (e | 1         | 0.65    | 69                   | 44.81              |
| Patients do not take responsibility for their heal | 1         | 0.65    | 70                   | 45.45              |
| Patients doctors and staff pushed to get patient o | 1         | 0.65    | 71                   | 46.10              |
| Patients refusing best DME for them                | 1         | 0.65    | 72                   | 46.75              |

| : 4                                                | Frequency | Percent | Cumulative Frequency | Cumulative Percent |
|----------------------------------------------------|-----------|---------|----------------------|--------------------|
| Paucity of out-patient support for patients with c | 1         | 0.65    | 73                   | 47.40              |
| Physical therapy d/c recom not followed            | 1         | 0.65    | 74                   | 48.05              |
| Physician follow up- a part of #1                  | 1         | 0.65    | 75                   | 48.70              |
| Physicians get paid more when patients are readmit | 1         | 0.65    | 76                   | 49.35              |
| Poor PT- physician communication                   | 1         | 0.65    | 77                   | 50.00              |
| Poor communication between providers               | 1         | 0.65    | 78                   | 50.65              |
| Poor health of our community (many chronic conditi | 1         | 0.65    | 79                   | 51.30              |
| Pt's sycho-social issues/ home support (or lack of | 1         | 0.65    | 80                   | 51.95              |
| Pt's with limited health literacy                  | 1         | 0.65    | 81                   | 52.60              |
| Recurrence of disease/disease not well managed     | 1         | 0.65    | 82                   | 53.25              |
| Renal failure                                      | 1         | 0.65    | 83                   | 53.90              |
| Rural status                                       | 1         | 0.65    | 84                   | 54.55              |
| SNF "milking" the patient's days in SNF and not pr | 1         | 0.65    | 85                   | 55.19              |
| Secondary complications (pneumonia, etc)           | 1         | 0.65    | 86                   | 55.84              |
| Stay active                                        | 1         | 0.65    | 87                   | 56.49              |
| Unaddressed pysch issues                           | 1         | 0.65    | 88                   | 57.14              |
| Underinsured                                       | 1         | 0.65    | 89                   | 57.79              |
| Unfollowed D/C recommendation placement            | 1         | 0.65    | 90                   | 58.44              |
| Very Sick Patients With Complex Medical History    | 1         | 0.65    | 91                   | 59.09              |
| Waiting times to see a primary care physician      | 1         | 0.65    | 92                   | 59.74              |
| When patients do not follow up with their physicia | 1         | 0.65    | 93                   | 60.39              |
| aspiration Pneumonia                               | 1         | 0.65    | 94                   | 61.04              |
| assist at home or lack thereof                     | 1         | 0.65    | 95                   | 61.69              |
| being discharged too early                         | 1         | 0.65    | 96                   | 62.34              |
| complicated chronic problems                       | 1         | 0.65    | 97                   | 62.99              |
| decreased communication overall with care team     | 1         | 0.65    | 98                   | 63.64              |
| decreased compliance w/ d/c recs (e.g., meds)      | 1         | 0.65    | 99                   | 64.29              |
| dehydration                                        | 1         | 0.65    | 100                  | 64.94              |
| depression due to functional dependence            | 1         | 0.65    | 101                  | 65.58              |
| drug issues                                        | 1         | 0.65    | 102                  | 66.23              |
| drug seeking behavior                              | 1         | 0.65    | 103                  | 66.88              |
| external locus of control (the doctor will fix me  | 1         | 0.65    | 104                  | 67.53              |
| failure to thrive                                  | 1         | 0.65    | 105                  | 68.18              |
| family noncompliant with our recommendations       | 1         | 0.65    | 106                  | 68.83              |
| fragile patients                                   | 1         | 0.65    | 107                  | 69.48              |

| : 5                                                | Frequency | Percent | Cumulative Frequency | Cumulative Percent |
|----------------------------------------------------|-----------|---------|----------------------|--------------------|
| health knowledge of caregiver                      | 1         | 0.65    | 108                  | 70.13              |
| high % of elderly clients                          | 1         | 0.65    | 109                  | 70.78              |
| inadequate direct follow up with the patient after | 1         | 0.65    | 110                  | 71.43              |
| inadequate management of chronic conditions        | 1         | 0.65    | 111                  | 72.08              |
| inadequate mobility in acute                       | 1         | 0.65    | 112                  | 72.73              |
| ineffective patient involvement in directing their | 1         | 0.65    | 113                  | 73.38              |
| insurance barriers                                 | 1         | 0.65    | 114                  | 74.03              |
| insurance coverage of d/c recommendation           | 1         | 0.65    | 115                  | 74.68              |
| insurance problems                                 | 1         | 0.65    | 116                  | 75.32              |
| lack of appropriate follow up care for medicaid pa | 1         | 0.65    | 117                  | 75.97              |
| lack of behaviorial modification                   | 1         | 0.65    | 118                  | 76.62              |
| lack of education                                  | 1         | 0.65    | 119                  | 77.27              |
| lack of family involvement/support                 | 1         | 0.65    | 120                  | 77.92              |
| lack of family/patient to provide care             | 1         | 0.65    | 121                  | 78.57              |
| lack of follow-through with home program           | 1         | 0.65    | 122                  | 79.22              |
| lack of home support                               | 1         | 0.65    | 123                  | 79.87              |
| lack of patien education                           | 1         | 0.65    | 124                  | 80.52              |
| lack of physician over-sight                       | 1         | 0.65    | 125                  | 81.17              |
| lack of proper post acute management of patient    | 1         | 0.65    | 126                  | 81.82              |
| lack of resources- community/social/financial- onc | 1         | 0.65    | 127                  | 82.47              |
| lack of social support using hospital as a social  | 1         | 0.65    | 128                  | 83.12              |
| lack of staff--RNs, CM, MSW, rehab                 | 1         | 0.65    | 129                  | 83.77              |
| lack of support(family dynamics/social issues)     | 1         | 0.65    | 130                  | 84.42              |
| limitations to post-d/c therapy services           | 1         | 0.65    | 131                  | 85.06              |
| limited value in therapy opinion for some high ris | 1         | 0.65    | 132                  | 85.71              |
| medical complexity                                 | 1         | 0.65    | 133                  | 86.36              |
| medical noncompliance                              | 1         | 0.65    | 134                  | 87.01              |
| mental health issues                               | 1         | 0.65    | 135                  | 87.66              |
| multiple doctors do not communicate with each othe | 1         | 0.65    | 136                  | 88.31              |
| outside facility care                              | 1         | 0.65    | 137                  | 88.96              |
| palliative care, end of life issues without plan,  | 1         | 0.65    | 138                  | 89.61              |
| patient knowledge deficit re self care             | 1         | 0.65    | 139                  | 90.26              |
| patient non-compliance with outpatient physician o | 1         | 0.65    | 140                  | 90.91              |
| patient/family anxiety                             | 1         | 0.65    | 141                  | 91.56              |
| patients cannot afford meds                        | 1         | 0.65    | 142                  | 92.21              |

| : 5                                                | Frequency | Percent | Cumulative Frequency | Cumulative Percent |
|----------------------------------------------------|-----------|---------|----------------------|--------------------|
| patients identified as fall risk but who decline u | 1         | 0.65    | 143                  | 92.86              |
| physicians not following PT recommendations for di | 1         | 0.65    | 144                  | 93.51              |
| poor access to primary care physicians             | 1         | 0.65    | 145                  | 94.16              |
| poor social support at home                        | 1         | 0.65    | 146                  | 94.81              |
| primary care physicians                            | 1         | 0.65    | 147                  | 95.45              |
| psycho-social issues (esp. chronic mental health p | 1         | 0.65    | 148                  | 96.10              |
| risky behaviors by pts                             | 1         | 0.65    | 149                  | 96.75              |
| social issues/homelessness                         | 1         | 0.65    | 150                  | 97.40              |
| socioeconmic factors at home                       | 1         | 0.65    | 151                  | 98.05              |
| support at home                                    | 1         | 0.65    | 152                  | 98.70              |
| transition out of acute care prematurely           | 1         | 0.65    | 153                  | 99.35              |
| various types of electronic medical records that d | 1         | 0.65    | 154                  | 100.00             |
|                                                    |           |         |                      |                    |

| : 5                                                                       | Frequency | Percent | Cumulative Frequency | Cumulative Percent |
|---------------------------------------------------------------------------|-----------|---------|----------------------|--------------------|
| Access to EMR by caregivers and patients                                  | 1         | 0.85    | 1                    | 0.85               |
| Bad Luck                                                                  | 1         | 0.85    | 2                    | 1.71               |
| Breathing issues                                                          | 1         | 0.85    | 3                    | 2.56               |
| Caregiver support                                                         | 1         | 0.85    | 4                    | 3.42               |
| Change in status                                                          | 1         | 0.85    | 5                    | 4.27               |
| Chf                                                                       | 1         | 0.85    | 6                    | 5.13               |
| Chronicity of Disease                                                     | 1         | 0.85    | 7                    | 5.98               |
| Complete discharge plan not established prior to discharge                | 1         | 0.85    | 8                    | 6.84               |
| Complications That Occurred at the OSF                                    | 1         | 0.85    | 9                    | 7.69               |
| Dec funding for certain facilities                                        | 1         | 0.85    | 10                   | 8.55               |
| Discharged too early from acute care                                      | 1         | 0.85    | 11                   | 9.40               |
| Disease progression/ Functional decline progression                       | 1         | 0.85    | 12                   | 10.26              |
| ED processes that promote admission rather than treat and release.        | 1         | 0.85    | 13                   | 11.11              |
| ED used by patients as primary care / urgent care                         | 1         | 0.85    | 14                   | 11.97              |
| Early DC due to push for decreased length of stay                         | 1         | 0.85    | 15                   | 12.82              |
| Falls                                                                     | 1         | 0.85    | 16                   | 13.68              |
| Family not equipped skill-wise or with right ancillary services at dc     | 1         | 0.85    | 17                   | 14.53              |
| Follow up appt should have been scheduled in 3-7 days vs two weeks.       | 1         | 0.85    | 18                   | 15.38              |
| HMO discharges that are premature                                         | 1         | 0.85    | 19                   | 16.24              |
| Huge variability of skill and competence of home care providers           | 1         | 0.85    | 20                   | 17.09              |
| Illiteracy/low education level of patients                                | 1         | 0.85    | 21                   | 17.95              |
| Immobility                                                                | 1         | 0.85    | 22                   | 18.80              |
| Inadequate medication reconciliation/planning                             | 1         | 0.85    | 23                   | 19.66              |
| Insurance issues                                                          | 2         | 1.71    | 25                   | 21.37              |
| Intensity of PT intervention not matching needs of patient while admitted | 1         | 0.85    | 26                   | 22.22              |
| Lack of "norms" to compare one patient's progress to another              | 1         | 0.85    | 27                   | 23.08              |
| Lack of carryover of education to family                                  | 1         | 0.85    | 28                   | 23.93              |
| Lack of family/care-giver involvement                                     | 1         | 0.85    | 29                   | 24.79              |
| Lack of medical follow-up                                                 | 1         | 0.85    | 30                   | 25.64              |
| Lack of sufficient patient education                                      | 1         | 0.85    | 31                   | 26.50              |
| Length of stay of initial admission                                       | 1         | 0.85    | 32                   | 27.35              |
| Limited family support                                                    | 1         | 0.85    | 33                   | 28.21              |
| Limited pt u defeat ding of condition and home management                 | 1         | 0.85    | 34                   | 29.06              |
| Medical Errors                                                            | 1         | 0.85    | 35                   | 29.91              |
| Multiple comorbidities                                                    | 1         | 0.85    | 36                   | 30.77              |



| : 5                                                                         | Frequency | Percent | Cumulative Frequency | Cumulative Percent |
|-----------------------------------------------------------------------------|-----------|---------|----------------------|--------------------|
| New illness                                                                 | 1         | 0.85    | 37                   | 31.62              |
| No caregiver                                                                | 1         | 0.85    | 38                   | 32.48              |
| Non-compliance by patient                                                   | 1         | 0.85    | 39                   | 33.33              |
| Not able to get transportation for follow up care                           | 1         | 0.85    | 40                   | 34.19              |
| Not sure                                                                    | 1         | 0.85    | 41                   | 35.04              |
| Out of network insurance in season (FL)                                     | 1         | 0.85    | 42                   | 35.90              |
| Patient & family understanding of prognosis and management at home          | 1         | 0.85    | 43                   | 36.75              |
| Patient decisions                                                           | 1         | 0.85    | 44                   | 37.61              |
| Patient non-compliance                                                      | 1         | 0.85    | 45                   | 38.46              |
| Patient non-compliance with follow up care plan                             | 1         | 0.85    | 46                   | 39.32              |
| Patient's lack of understanding of their disease                            | 1         | 0.85    | 47                   | 40.17              |
| Patients not feeling ready to be discharged                                 | 1         | 0.85    | 48                   | 41.03              |
| Patients not following HEP/home safety recommendations                      | 1         | 0.85    | 49                   | 41.88              |
| Patients not understanding disease process                                  | 1         | 0.85    | 50                   | 42.74              |
| Patients refuse rehab                                                       | 1         | 0.85    | 51                   | 43.59              |
| Polypharmacy                                                                | 2         | 1.71    | 53                   | 45.30              |
| Poor communication within the continuum of care.                            | 1         | 0.85    | 54                   | 46.15              |
| Poor follow-up after discharge re: equipment, therapy, recommendations      | 1         | 0.85    | 55                   | 47.01              |
| Poor quality therapy in SNF                                                 | 1         | 0.85    | 56                   | 47.86              |
| Poor understanding and ownership of how to manage disease process.          | 1         | 0.85    | 57                   | 48.72              |
| Poor understanding of the role of a hospital in managing things like dement | 1         | 0.85    | 58                   | 49.57              |
| Psychosocial status                                                         | 1         | 0.85    | 59                   | 50.43              |
| Pt's insurance declining to approve the recommended discharge destination   | 1         | 0.85    | 60                   | 51.28              |
| Pts. refusing to DC to anywhere but home                                    | 1         | 0.85    | 61                   | 52.14              |
| Recieve post acute therapy                                                  | 1         | 0.85    | 62                   | 52.99              |
| SNF decision making -- send to ER                                           | 1         | 0.85    | 63                   | 53.85              |
| Secondary complications                                                     | 1         | 0.85    | 64                   | 54.70              |
| Unable to obtain medications                                                | 1         | 0.85    | 65                   | 55.56              |
| Unrealistic expectations of patients and families regarding how they will p | 1         | 0.85    | 66                   | 56.41              |
| Use of the ED                                                               | 1         | 0.85    | 67                   | 57.26              |
| altered mobility                                                            | 1         | 0.85    | 68                   | 58.12              |
| co-morbidities                                                              | 1         | 0.85    | 69                   | 58.97              |
| cognition issues plus poor social support                                   | 1         | 0.85    | 70                   | 59.83              |
| cognitive status                                                            | 1         | 0.85    | 71                   | 60.68              |
| communication                                                               | 1         | 0.85    | 72                   | 61.54              |

| : 5                                                                         | Frequency | Percent | Cumulative Frequency | Cumulative Percent |
|-----------------------------------------------------------------------------|-----------|---------|----------------------|--------------------|
| complex medical conditions                                                  | 1         | 0.85    | 73                   | 62.39              |
| complex medical patients                                                    | 1         | 0.85    | 74                   | 63.25              |
| complications of alcohol/drug abuse                                         | 1         | 0.85    | 75                   | 64.10              |
| decrease in health status                                                   | 1         | 0.85    | 76                   | 64.96              |
| delay in follow-up services                                                 | 1         | 0.85    | 77                   | 65.81              |
| drug and alcohol abuse by patients, non-compliance for pyschiatric conditio | 1         | 0.85    | 78                   | 66.67              |
| falls                                                                       | 1         | 0.85    | 79                   | 67.52              |
| falls and frequent hospitalizations without rehab                           | 1         | 0.85    | 80                   | 68.38              |
| family/patient refusing recommendations                                     | 1         | 0.85    | 81                   | 69.23              |
| high % of clients with multiple comorbidities                               | 1         | 0.85    | 82                   | 70.09              |
| high volume of patients and turn over daily                                 | 1         | 0.85    | 83                   | 70.94              |
| immobility post-d/c                                                         | 1         | 0.85    | 84                   | 71.79              |
| inadaquete psychosocial support                                             | 1         | 0.85    | 85                   | 72.65              |
| inadequate emphasis on wellness and prevention                              | 1         | 0.85    | 86                   | 73.50              |
| inadequate supervision of patients when a certain level of adult supervisio | 1         | 0.85    | 87                   | 74.36              |
| infection                                                                   | 1         | 0.85    | 88                   | 75.21              |
| infections                                                                  | 1         | 0.85    | 89                   | 76.07              |
| infrequent homecare visits                                                  | 1         | 0.85    | 90                   | 76.92              |
| lack of collaboration/communication by acute care team                      | 1         | 0.85    | 91                   | 77.78              |
| lack of intervention by MD at SNF or rehab                                  | 1         | 0.85    | 92                   | 78.63              |
| lack of mobility                                                            | 1         | 0.85    | 93                   | 79.49              |
| lack of resources(financial issues)                                         | 1         | 0.85    | 94                   | 80.34              |
| lack of social support                                                      | 1         | 0.85    | 95                   | 81.20              |
| limited follow up with pt once home                                         | 1         | 0.85    | 96                   | 82.05              |
| medical issues being incompletely managed in acute setting                  | 1         | 0.85    | 97                   | 82.91              |
| mental health issues                                                        | 1         | 0.85    | 98                   | 83.76              |
| n/a                                                                         | 1         | 0.85    | 99                   | 84.62              |
| no lifestyle change                                                         | 1         | 0.85    | 100                  | 85.47              |
| not discharging to recommended post acute level of care                     | 1         | 0.85    | 101                  | 86.32              |
| observation/outpatient admission status                                     | 1         | 0.85    | 102                  | 87.18              |
| patient compliance/finances                                                 | 1         | 0.85    | 103                  | 88.03              |
| patient lack of resources to remain well                                    | 1         | 0.85    | 104                  | 88.89              |
| patients with cognitive impairments who improperly take medications, forget | 1         | 0.85    | 105                  | 89.74              |
| poor communication                                                          | 1         | 0.85    | 106                  | 90.60              |
| poor health insurance- going straight to the ER                             | 1         | 0.85    | 107                  | 91.45              |

| : 5                                                                         | Frequency | Percent | Cumulative Frequency | Cumulative Percent |
|-----------------------------------------------------------------------------|-----------|---------|----------------------|--------------------|
| poor health literacy                                                        | 1         | 0.85    | 108                  | 92.31              |
| poor patient education in hospital                                          | 1         | 0.85    | 109                  | 93.16              |
| pressure to reduce the length of stay                                       | 1         | 0.85    | 110                  | 94.02              |
| pt non compliance                                                           | 1         | 0.85    | 111                  | 94.87              |
| pt's not discharging to recommended level of care - especially those who ne | 1         | 0.85    | 112                  | 95.73              |
| pt's will poor social support                                               | 1         | 0.85    | 113                  | 96.58              |
| pt/ family non compliance w/ d/c instructions both medical and functional/  | 1         | 0.85    | 114                  | 97.44              |
| push for rapid discharges and in some areas of the hospitals- late therapy  | 1         | 0.85    | 115                  | 98.29              |
| reluctance to discuss end of life wishes/plans                              | 1         | 0.85    | 116                  | 99.15              |
| secondary complication - infection/cellulitis/etc.                          | 1         | 0.85    | 117                  | 100.00             |
|                                                                             |           |         |                      |                    |
